# Supplementary material for: Exploring the Potential of Phytocompounds for Targeting Epigenetic Mechanisms in Rheumatoid Arthritis: An In Silico Study Using Similarity Indexing
Source: MDPI journal article supplement (doi:10.3390/molecules28062430), 2023-03-07
Supplement: s1 [file s1]

# Exploring the Potential of Phytocompounds for Targeting Epigenetic Mechanisms in Rheumatoid Arthritis: An In Silico Study Using Similarity Indexing

Sanjay H. Deshpande <sup>1</sup>, Zabin K. Bagewadi <sup>1,\*</sup>, T. M. Yunus Khan <sup>2</sup>, Mater H. Mahnashi <sup>3,\*</sup>, Ibrahim Ahmed Shaikh <sup>4</sup>, Sultan Alshehery <sup>2</sup>, Aejaz A. Khan <sup>5</sup>, Vishal S. Patil <sup>6</sup> and Subarna Roy <sup>6</sup>

<sup>1</sup> Department of Biotechnology, KLE Technological University, Hubballi 580031, India

<sup>2</sup> Department of Mechanical Engineering, College of Engineering, King Khalid University, Abha 61421, Saudi Arabia

<sup>3</sup> Department of Pharmaceutical Chemistry, College of Pharmacy, Najran University, Najran 66462, Saudi Arabia

<sup>4</sup> Department of Pharmacology, College of Pharmacy, Najran University, Najran 66462, Saudi Arabia

<sup>5</sup> Department of General Science, Ibn Sina National College for Medical Studies, Jeddah- 22421, Saudi Arabia

<sup>6</sup> ICMR—National Institute of Traditional Medicine, Belagavi 590010, India

\* Correspondence: zabinb@gmail.com (Z.K.B.); matermaha@gmail.com (M.H.M.)

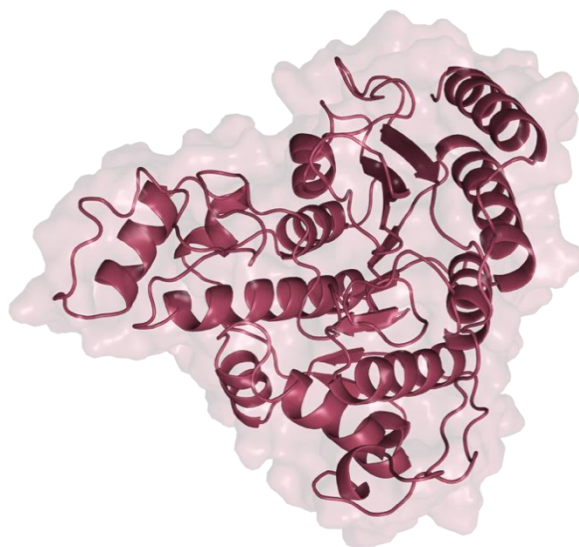

**Figure S1.** Protein structure of HDAC8 (PDB id: 1T69) with its structural and functionally important regions.

**Table S1.** List of plants used for the treatment of Rheumatoid arthritis across the globe.

| Plant Names                  |                               |                                |
|------------------------------|-------------------------------|--------------------------------|
| <i>Abies Webbiana</i>        | <i>Calophyllum inophyllum</i> | <i>Garcinia mangostana</i>     |
| <i>Aconitum chasmanthum</i>  | <i>Capparis decidua</i>       | <i>Glycyrrhiza glabra</i>      |
| <i>Aconitum deinorrhizum</i> | <i>Capsicum frutescens</i>    | <i>Glycyrrhiza uralensis</i>   |
| <i>Aconitum Falconeri</i>    | <i>Citrus aurantium</i>       | <i>Hygrophila auriculata</i>   |
| <i>Aconitum laciniatum</i>   | <i>Coptis chinensis</i>       | <i>Linum usitatissimum</i>     |
| <i>Actea Spicata</i>         | <i>Coptis japonica</i>        | <i>Momordica charantia</i>     |
| <i>Aesculus indica</i>       | <i>Costus speciosus</i>       | <i>Paeonia lactiflora</i>      |
| <i>Anisomeles malabarica</i> | <i>Cucurbita aurantia</i>     | <i>Platycodon grandiflorus</i> |
| <i>Apium Graveolens</i>      | <i>Cucurbita pepo</i>         | <i>Salix alba</i>              |
| <i>Balsamodendron Mukul</i>  | <i>Curcuma longa</i>          | <i>Semecarpus anacardium</i>   |
| <i>Berberis vulgaris</i>     | <i>Dalbergia canceledaria</i> | <i>Tanacetum vulgare</i>       |
| <i>Boerhavia diffusa</i>     | <i>Eclipta alba</i>           | <i>Withania somnifera</i>      |
| <i>Borago officinalis</i>    | <i>Equisetum arvense</i>      |                                |
| <i>Boswellia serrata</i>     | <i>Fraxinus hookeri</i>       |                                |

**Table S2.** The level of descriptors and the descriptors for each level.

| Level         | Descriptors                                                      |
|---------------|------------------------------------------------------------------|
| 1D Properties | Molecular Weight, logP, PSA                                      |
| 2D Properties | Fingerprints, topological indices, maximum common sub-structures |
| 3D Properties | Molecular fields, Shape                                          |

**Table S3.** ADMET properties of SAHA and Aglaithioduline.

| Property     | Model Name                    | SAHA   | Aglaithioduline | Unit                                        |
|--------------|-------------------------------|--------|-----------------|---------------------------------------------|
| Absorption   | Water solubility              | -2.217 | -3.099          | Numeric (log mol/L)                         |
| Absorption   | Caco2 permeability            | 0.8    | 1.466           | Numeric (log Papp in 10 <sup>-6</sup> cm/s) |
| Absorption   | Intestinal absorption (human) | 88.65  | 93.551          | Numeric (% Absorbed)                        |
| Absorption   | Skin Permeability             | -3.052 | -3.197          | Numeric (log Kp)                            |
| Absorption   | P-glycoprotein substrate      | Yes    | Yes             | Categorical (Yes/No)                        |
| Absorption   | P-glycoprotein I inhibitor    | No     | No              | Categorical (Yes/No)                        |
| Absorption   | P-glycoprotein II inhibitor   | No     | No              | Categorical (Yes/No)                        |
| Distribution | VDss (human)                  | -0.144 | -0.022          | Numeric (log L/kg)                          |
| Distribution | Fraction unbound (human)      | 0.333  | 0.173           | Numeric (Fu)                                |
| Distribution | BBB permeability              | -0.806 | -0.329          | Numeric (log BB)                            |
| Distribution | CNS permeability              | -2.811 | -2.831          | Numeric (log PS)                            |
| Metabolism   | CYP2D6 substrate              | No     | No              | Categorical (Yes/No)                        |
| Metabolism   | CYP3A4 substrate              | No     | Yes             | Categorical (Yes/No)                        |
| Metabolism   | CYP1A2 inhibitor              | No     | No              | Categorical (Yes/No)                        |
| Metabolism   | CYP2C19 inhibitor             | No     | No              | Categorical (Yes/No)                        |
| Metabolism   | CYP2C9 inhibitor              | No     | No              | Categorical (Yes/No)                        |
| Metabolism   | CYP2D6 inhibitor              | No     | No              | Categorical (Yes/No)                        |
| Metabolism   | CYP3A4 inhibitor              | No     | No              | Categorical (Yes/No)                        |

|           |                                   |       |       |                            |
|-----------|-----------------------------------|-------|-------|----------------------------|
| Excretion | Total Clearance                   | 0.408 | 0.132 | Numeric (log ml/min/kg)    |
| Excretion | Renal OCT2 substrate              | No    | No    | Categorical (Yes/No)       |
| Toxicity  | AMES toxicity                     | No    | No    | Categorical (Yes/No)       |
| Toxicity  | Max. tolerated dose (human)       | 0.813 | 0.329 | Numeric (log mg/kg/day)    |
| Toxicity  | hERG I inhibitor                  | No    | No    | Categorical (Yes/No)       |
| Toxicity  | hERG II inhibitor                 | No    | No    | Categorical (Yes/No)       |
| Toxicity  | Oral Rat Acute Toxicity (LD50)    | 2.113 | 2.353 | Numeric (mol/kg)           |
| Toxicity  | Oral Rat Chronic Toxicity (LOAEL) | 2.885 | 1.807 | Numeric (log mg/kg_bw/day) |
| Toxicity  | Hepatotoxicity                    | No    | No    | Categorical (Yes/No)       |
| Toxicity  | Skin Sensitisation                | No    | No    | Categorical (Yes/No)       |
| Toxicity  | T.Pyriformis toxicity             | 0.54  | 1.447 | Numeric (log ug/L)         |
| Toxicity  | Minnow toxicity                   | 1.067 | 1.27  | Numeric (log mM)           |

---
